# Supplementary material for: Pathways for the carbon peak of resource-based cities under an energy-water coupling relationship: A case study of Taiyuan, Shanxi Province
Source: Frontiers journal article supplement (doi:10.3389/fenvs.2022.994543), 2022-12-08
Supplement: Data_Sheet_1.PDF [file Data_Sheet_1.PDF]

## *Supplementary Material*

### 1 Supplementary Figures and Tables

#### 1.1 Supplementary Tables

**Supplementary Table 1.** Core variables and equations of the subsystems.

| Subsystem  | Variables                          | Equations                                                                                                                                                                                                         |
|------------|------------------------------------|-------------------------------------------------------------------------------------------------------------------------------------------------------------------------------------------------------------------|
| Population | Total population                   | $342.85 + \int (\text{Birth population} - \text{Death population})dt$                                                                                                                                             |
|            | Urban population                   | $\text{Total population} \times \text{Urbanization rate} \times \text{Urbanization process} / 0.7$                                                                                                                |
|            | Rural population                   | $\text{Total population} - \text{Urban population}$                                                                                                                                                               |
|            | Per capita carbon emissions        | $\text{Total carbon emissions} / \text{Total population}$                                                                                                                                                         |
| Economic   | Output value of primary industry   | $20.19 + \int (\text{Added value of primary industry})dt$                                                                                                                                                         |
|            | Added value of primary industry    | $\text{Output value of primary industry} \times \text{Annual growth rate of output value of primary industry}$                                                                                                    |
|            | Output value of secondary industry | $418.54 + \int (\text{Added value of secondary industry})dt$                                                                                                                                                      |
|            | Added value of secondary industry  | $\text{Output value of secondary industry} \times \text{Annual growth rate of output value of secondary industry}$                                                                                                |
|            | Output value of tertiary industry  | $454.44 + \int (\text{Added value of tertiary industry})dt$                                                                                                                                                       |
|            | Added value of tertiary industry   | $\text{Added value of GDP of transportation, storage and postal industry} + \text{Added value of GDP of wholesale, retail and accommodation catering industries} + \text{Added value of GDP in other industries}$ |

|        |                                        |                                                                                                                                                                                        |
|--------|----------------------------------------|----------------------------------------------------------------------------------------------------------------------------------------------------------------------------------------|
|        | GDP                                    | Output value of primary industry+ Output value of secondary industry+ Output value of tertiary industry                                                                                |
|        | Per capita GDP                         | GDP/Total population                                                                                                                                                                   |
|        | Carbon emission per unit of GDP        | Total carbon emissions /GDP                                                                                                                                                            |
| Energy | Energy consumption of domestic water   | Unit energy consumption of domestic water ×Domestic water                                                                                                                              |
|        | Energy consumption of production water | Unit energy consumption of production water×Production water                                                                                                                           |
|        | Energy consumption of water            | Energy consumption of domestic water+ Energy consumption of production water                                                                                                           |
|        | Energy consumption of sewage discharge | Unit energy consumption of sewage discharge×Total effluent discharge                                                                                                                   |
|        | Energy consumption of sewage reuse     | Sewage reuse×Unit energy consumption of sewage reuse×0.8/Sewage reuse technology                                                                                                       |
|        | Energy consumption of reclaimed water  | Unit energy consumption of reclaimed water×Reclaimed water                                                                                                                             |
|        | Energy consumption of water conveyance | Domestic water×Conveyance coefficient of domestic water+ Production water×Conveyance coefficient of production water+ Ecological water×Conveyance coefficient of ecological water      |
|        | Water-related energy consumption       | Energy consumption of water+ Energy consumption of water conveyance+ Energy consumption of sewage discharge+ Energy consumption of sewage reuse+ Energy consumption of reclaimed water |
|        | Energy-related water consumption       | (Water consumption of coal+ Water consumption of oil+ Water consumption of natural gas+ Water consumption of electricity)                                                              |

|       |                                        |                                                                                                                                                                                    |
|-------|----------------------------------------|------------------------------------------------------------------------------------------------------------------------------------------------------------------------------------|
|       | Water consumption of coal              | $(\text{Coal consumption} \times \text{Unit water consumption of coal}) / 10000$                                                                                                   |
|       | Coal consumption                       | $\text{Total energy consumption} \times \text{Proportion of coal}$                                                                                                                 |
|       | Carbon emission of coal                | $\text{Coal consumption} \times \text{Coefficient of carbon emission of coal}$                                                                                                     |
|       | Carbon emissions of energy consumption | $\text{Carbon emission of coal} + \text{Carbon emission of oil} + \text{Carbon emission of natural gas} + \text{Carbon emission of electricity}$                                   |
| Water | Domestic water for urban residents     | $\text{Urban population} \times \text{Urban per capita annual water consumption} \times 0.5 / \text{Water-saving policy}$                                                          |
|       | Domestic water for rural residents     | $\text{Rural population} \times \text{Rural per capita annual water consumption}$                                                                                                  |
|       | Domestic water                         | $\text{Domestic water for urban residents} + \text{Domestic water for rural residents}$                                                                                            |
|       | Agricultural water consumption         | $\text{Total output value of agriculture} \times \text{Water consumption per unit agricultural output value} \times 1 / \text{Coefficient of the effective utilization of water}$  |
|       | Industrial water consumption           | $\text{Total industrial output value} \times \text{Water consumption per unit output value of secondary industry}$                                                                 |
|       | Water consumption of tertiary industry | $\text{Output value of tertiary industry} \times \text{Water consumption per unit output value of tertiary industry}$                                                              |
|       | Production water                       | $\text{Agricultural water consumption} + \text{Water consumption of secondary industry} + \text{Water consumption of tertiary industry} + \text{Energy-related water consumption}$ |
|       | Water consumption                      | $\text{Domestic water} + \text{Production water} + \text{Ecological water}$                                                                                                        |

|                                          |                                                                                                               |
|------------------------------------------|---------------------------------------------------------------------------------------------------------------|
| Domestic sewage discharge                | Domestic water×Discharge coefficient of domestic sewage                                                       |
| Production wastewater discharge          | Production water ×Discharge coefficient of production wastewater                                              |
| Total effluent discharge                 | Domestic sewage discharge + Production wastewater discharge                                                   |
| Sewage treatment                         | Total effluent discharge×Sewage treatment rate                                                                |
| Sewage reuse                             | Sewage treatment×Sewage reuse rate                                                                            |
| Carbon emission of irrigation            | Effective irrigation area×Coefficient of carbon emission of irrigation water                                  |
| Carbon emission of domestic sewage       | Domestic sewage discharge×Coefficient of carbon emission of domestic sewage                                   |
| Carbon emission of production wastewater | Production wastewater discharge×Coefficient of carbon emission of production wastewater                       |
| Carbon emission of water consumption     | Carbon emission of domestic sewage+ Carbon emission from production wastewater+ Carbon emission of irrigation |
| Total carbon emissions                   | Carbon emissions of energy consumption+ Carbon emission of water consumption                                  |

**Supplementary Table 2.** Results of the analysis of the effectiveness of the SD simulation model.

| Year | Population/<br>(10000 persons)<br>(Relative error %) |                 |                 | Economic output/<br>100 million yuan<br>(Relative error %) |                 | Water/<br>100 million cu.m<br>(Relative error %) |                 | Energy/<br>10000 tons of SCE<br>(Relative error %) |                  |
|------|------------------------------------------------------|-----------------|-----------------|------------------------------------------------------------|-----------------|--------------------------------------------------|-----------------|----------------------------------------------------|------------------|
|      | Tp <sup>a</sup>                                      | Up <sup>b</sup> | Rp <sup>c</sup> | Pi <sup>d</sup>                                            | Si <sup>e</sup> | Dw <sup>f</sup>                                  | Pw <sup>g</sup> | Twc <sup>h</sup>                                   | Tec <sup>i</sup> |
| 2005 | 0.00                                                 | -0.01           | 0.05            | 0.00                                                       | 0.00            | -0.01                                            | -0.67           | -0.41                                              | 0.00             |
| 2006 | 0.04                                                 | 0.09            | -0.17           | 0.00                                                       | 0.00            | 0.06                                             | -0.61           | -0.25                                              | 0.00             |
| 2007 | -0.10                                                | -0.15           | 0.11            | 0.00                                                       | 0.00            | -0.12                                            | -0.60           | -0.41                                              | 0.00             |

## Supplementary Material

|      |       |       |       |      |      |       |       |       |       |
|------|-------|-------|-------|------|------|-------|-------|-------|-------|
| 2008 | 0.09  | 0.10  | 0.07  | 0.00 | 0.00 | 0.09  | -0.65 | -0.38 | 0.00  |
| 2009 | 0.02  | 0.00  | 0.14  | 0.00 | 0.00 | 0.01  | -0.63 | -0.40 | 0.00  |
| 2010 | -0.06 | -0.11 | 0.17  | 0.00 | 0.00 | -0.10 | -0.71 | -0.45 | 0.00  |
| 2011 | -0.06 | -0.12 | 0.20  | 0.00 | 0.00 | -0.09 | -0.79 | -0.34 | 0.00  |
| 2012 | -0.01 | 0.05  | -0.32 | 0.00 | 0.00 | 0.00  | -0.78 | -0.44 | 0.00  |
| 2013 | 0.12  | 0.10  | 0.21  | 0.00 | 0.00 | 0.11  | -0.72 | -1.66 | 0.00  |
| 2014 | -0.01 | 0.01  | -0.17 | 0.00 | 0.00 | 0.00  | -0.69 | -0.24 | 0.00  |
| 2015 | 0.02  | 0.01  | 0.05  | 0.00 | 0.00 | 0.02  | -0.69 | -0.53 | 0.00  |
| 2016 | 0.10  | 0.14  | -0.20 | 0.00 | 0.00 | 0.09  | -0.69 | -0.21 | 0.00  |
| 2017 | -0.04 | -0.06 | 0.05  | 0.00 | 0.00 | -0.05 | -0.74 | -0.50 | 0.00  |
| 2018 | -0.04 | -0.07 | 0.17  | 0.00 | 0.00 | -0.05 | 3.32  | 1.90  | -1.05 |
| 2019 | 0.11  | 0.11  | 0.13  | 0.00 | 0.00 | 0.11  | 0.03  | 0.12  | -2.19 |
| 2020 | -0.10 | 0.01  | 0.05  | 0.00 | 0.00 | 0.07  | -0.69 | 0.10  | -1.10 |
| 2021 | 0.01  | 0.01  | 0.03  | 0.00 | 0.00 | -0.10 | -0.70 | 0.01  | -0.97 |

**Notes:** <sup>a</sup> Total population; <sup>b</sup> Urban population; <sup>c</sup> Rural Population; <sup>d</sup> Primary industry; <sup>e</sup> Secondary industry; <sup>f</sup> Domestic water; <sup>g</sup> Production water; <sup>h</sup> Total water consumption; <sup>i</sup> Total energy consumption.
